# Supplementary material
Source: ML conference proceedings conference paper supplement (https://proceedings.neurips.cc/paper_files/paper/2022/hash/34260a400e39a802961470b3d3de99cc-Abstract.html)
Supplement: Supplementary file 1 [file 34260a400e39a802961470b3d3de99cc-Supplemental-Conference.zip]

Archive with 14 entries (13 files):
- supp/
- __MACOSX/._supp
- supp/.Rhistory
- __MACOSX/supp/._.Rhistory
- supp/.DS_Store
- __MACOSX/supp/._.DS_Store
- supp/fuse_orth_ALS_main.R
- __MACOSX/supp/._fuse_orth_ALS_main.R
- supp/demo.R
- __MACOSX/supp/._demo.R
- supp/README.md
- __MACOSX/supp/._README.md
- supp/supp_fused_orth_als_v3.pdf
- __MACOSX/supp/._supp_fused_orth_als_v3.pdf
