# Supplementary material
Source: ML conference proceedings conference paper supplement (https://proceedings.neurips.cc/paper_files/paper/2022/hash/34260a400e39a802961470b3d3de99cc-Abstract.html)
Supplement: Supplementary file 1 [file 34260a400e39a802961470b3d3de99cc-Supplemental-Conference.zip › supp/README.md]

### Software accompaniment to:

Fused Orthogonal Alternating Least Squares for Tensor Clustering

The software folder contains R functions for fused orthogonal alternating least sqaures algorithm for tensor multi-modes clustering.

-  fused-orth_ALS_main.R includes main function for fused orthogonal alternating least sqaures algorithm for clustering over third mode. Multi-modes clustering can be easily extended by adding generalized lasso penalty to first and second modes.
-  demo.R is a toy example for how to implement fused-orth_ALS_main.R
